# Supplementary material
Source: PubMed Central journal article supplement (PMC3183285)
Supplement: NIHMS317937-supplement-01.pdf [file NIHMS317937-supplement-01.pdf]

Supplemental Table 1. bDNA probe sets.

| Target Sequence     | Function | Probe Sequence                                    |
|---------------------|----------|---------------------------------------------------|
| Fan1: NM_177893     |          |                                                   |
| 1611-1631           | CE       | ggcctttacagactcgaagcTTTTTctcttgaaagaaagt          |
| 1675-1697           | CE       | gcttctcgtcttccatggaatcTTTTTctcttgaaagaaagt        |
| 1741-1760           | CE       | aactccattcggcccagattTTTTTctcttgaaagaaagt          |
| 1782-1803           | CE       | gtccctgaagatctgggtctcTTTTTctcttgaaagaaagt         |
| 1804-1826           | CE       | gcgatctgatgaggctctctTTTTTctcttgaaagaaagt          |
| 1593-1610           | LE       | gaccggccagccaagtctTTTTTaggcataggaccctgtct         |
| 1632-1649           | LE       | cgggcaaacacagccctaTTTTTaggcataggaccctgtct         |
| 1698-1716           | LE       | acctgacccccacaagcaTTTTTaggcataggaccctgtct         |
| 1717-1740           | LE       | gaccaatagcacagtagacagctgTTTTTaggcataggaccctgtct   |
| 1761-1781           | LE       | cggcagatggtgtactgaggaTTTTTaggcataggaccctgtct      |
| 1827-1844           | LE       | agcatgtgtcggctgctTTTTTaggcataggaccctgtct          |
| 1845-1866           | LE       | catggcagctgagatgtcactcTTTTTaggcataggaccctgtct     |
| 1867-1885           | LE       | cctcccagtcccactggcTTTTTaggcataggaccctgtct         |
| 1650-1674           | BL       | agtcaatgagaacagaagcaagatt                         |
| mKi67: NM_001081117 |          |                                                   |
| 2503-2523           | CE       | agactgctgcttgctgcattTTTTTctcttgaaagaaagt          |
| 2552-2570           | CE       | tgttgatgctccgctcTTTTTctcttgaaagaaagt              |
| 2714-2738           | CE       | tctgtttttcattcatagttccaTTTTTctcttgaaagaaagt       |
| 2809-2830           | CE       | cgttttcattgtcctgcacctgTTTTTctcttgaaagaaagt        |
| 2478-2502           | LE       | ccgagtactggatagcacttttctTTTTTaggcataggaccctgtct   |
| 2571-2594           | LE       | ttaggagttgcactgtgtttcaTTTTTaggcataggaccctgtct     |
| 2595-2620           | LE       | caaggtcagtaatggtatggacattcTTTTTaggcataggaccctgtct |
| 2621-2644           | LE       | tctcagagaccggagtcttctTTTTTaggcataggaccctgtct      |
| 2739-2760           | LE       | ggtgttctcagcaaggactgctTTTTTaggcataggaccctgtct     |
| 2783-2808           | LE       | ttgatctacttttgttctcgaatgTTTTTaggcataggaccctgtct   |
| 2854-2878           | LE       | tttctgaacctcacttaattcaccTTTTTaggcataggaccctgtct   |
| 2879-2903           | LE       | gcactgatctcctagctgatgctTTTTTaggcataggaccctgtct    |
| 2524-2551           | BL       | ttaaggtaggactgcagaatatctatc                       |
| 2645-2664           | BL       | tcagctctcaggggctctg                               |
| 2665-2688           | BL       | tcttctaactgctcacactcga                            |
| 2689-2713           | BL       | caagggtatgctgagctctctaga                          |

|                  |    |                                                     |
|------------------|----|-----------------------------------------------------|
| 2761-2782        | BL | tccccctaaatgtcttgctgt                               |
| 2831-2853        | BL | acttccttgcatcttgaggag                               |
| Top2a: NM_011623 |    |                                                     |
| 3587-3611        | CE | agatctgatggactctttgctttaTTTTTctcttgaaagaaagt        |
| 3659-3677        | CE | tcctgctttccttggcctTTTTTctcttgaaagaaagt              |
| 3759-3778        | CE | ggatgactctttgccccgaTTTTTctcttgaaagaaagt             |
| 3801-3824        | CE | ctaattttcttctgcctcagctTTTTTctcttgaaagaaagt          |
| 3889-3909        | CE | cttctctattcgttgcggagTTTTTctcttgaaagaaagt            |
| 3541-3562        | LE | cgtttcttgttgcacagctTTTTTtaggcataggaccctgtct         |
| 3612-3633        | LE | aacagccagatctcctccacTTTTTtaggcataggaccctgtct        |
| 3634-3658        | LE | cgacaacctccagttctcaataaaTTTTTtaggcataggaccctgtct    |
| 3698-3715        | LE | ttgctttccccgcctttcTTTTTtaggcataggaccctgtct          |
| 3716-3737        | LE | cacatctgtgctttctcccctTTTTTtaggcataggaccctgtct       |
| 3871-3888        | LE | gcttcctggttccgcaccTTTTTtaggcataggaccctgtct          |
| 3563-3586        | BL | atgtgtgagctctgttcctct                               |
| 3678-3697        | BL | caggaaggcccactgttca                                 |
| 3738-3758        | BL | ggagaaggcaagacgtcagca                               |
| 3779-3800        | BL | ttcatctccacagtcactggg                               |
| 3825-3850        | BL | caacgtttcactcttaattttctc                            |
| 3851-3870        | BL | atcctcagcaggggtaccct                                |
| Odc1: NM_013614  |    |                                                     |
| 711-735          | CE | ctttgatcttcagatccaggaaagTTTTTctcttgaaagaaagt        |
| 808-829          | CE | tgcttgctcagctatgattctTTTTTctcttgaaagaaagt           |
| 967-992          | CE | taaagaatgcagttaaatgatccataTTTTTctcttgaaagaaagt      |
| 1014-1033        | CE | tgggtctcttctgcagcaggTTTTTctcttgaaagaaagt            |
| 689-710          | LE | ccaccaccaatatcaagcagatTTTTTtaggcataggaccctgtct      |
| 762-782          | LE | ttgtccagagctgggtgattTTTTTtaggcataggaccctgtct        |
| 854-874          | LE | caatgatgtgactgcaagcgTTTTTtaggcataggaccctgtct        |
| 875-895          | LE | cctccacacggttttttgTTTTTtaggcataggaccctgtct          |
| 914-939          | LE | ggtttgttcattgactcatctcatTTTTTtaggcataggaccctgtct    |
| 940-966          | LE | tactccatcattcacataatacatgaaTTTTTtaggcataggaccctgtct |
| 993-1013         | LE | gccttcacatgggcatgatcaTTTTTtaggcataggaccctgtct       |
| 1034-1058        | LE | gatgagtaatacttctcgtctggctTTTTTtaggcataggaccctgtct   |
| 736-761          | BL | acactgggatctctcaaatttaag                            |

|                 |    |                                                    |
|-----------------|----|----------------------------------------------------|
| 783-807         | BL | cactccagagtctgatggaagtac                           |
| 830-853         | BL | tgaaagctgatgcgacatagtatc                           |
| 896-913         | BL | cgtcagagccgggctgct                                 |
| Sod1: NM_011434 |    |                                                    |
| 103-120         | CE | ccatgctccccgggagaTTTTTctcttgaaagaaagt              |
| 139-155         | CE | accgtcgccctcagcaTTTTTctcttgaaagaaagt               |
| 218-242         | CE | gccttcagtaaatcctgtaattgtTTTTTctcttgaaagaaagt       |
| 71-89           | LE | cctccggaggaccagagaTTTTTtaggcataggaccctgtct         |
| 121-138         | LE | cgcacaccgcttcatcgTTTTTtaggcataggaccctgtct          |
| 156-173         | LE | gatggtccctgcaccggTTTTTtaggcataggaccctgtct          |
| 195-217         | LE | cctgacaacacaactggtcaccTTTTTtaggcataggaccctgtct     |
| 262-286         | LE | ccttggtattgtcccatactgatTTTTTtaggcataggaccctgtct    |
| 287-309         | LE | aatgaggctctgcactggtacagTTTTTtaggcataggaccctgtct    |
| 90-102          | BL | cgcgcgccggcct                                      |
| 174-194         | BL | gcttgccctctgctcgaagtg                              |
| 243-261         | BL | ggacgtggaacccatgctg                                |
| Sod2: NM_013671 |    |                                                    |
| 169-189         | CE | cgctgctctcctcagaacacgTTTTTctcttgaaagaaagt          |
| 338-356         | CE | tgcagctgatgatctgctTTTTTctcttgaaagaaagt             |
| 417-434         | CE | cccttgccagagcctcgTTTTTctcttgaaagaaagt              |
| 190-215         | LE | cacaacattattgaggtttacacgacTTTTTtaggcataggaccctgtct |
| 230-246         | LE | cagcctcctgcccgtgcTTTTTtaggcataggaccctgtct          |
| 277-296         | LE | tctgggaggctgtgctgtgTTTTTtaggcataggaccctgtct        |
| 297-316         | LE | cgccatagtcgtaaggcaggTTTTTtaggcataggaccctgtct       |
| 317-337         | LE | cgtaatgtgtggctccagcgTTTTTtaggcataggaccctgtct       |
| 357-374         | LE | gcgtggtgcttctgtggTTTTTtaggcataggaccctgtct          |
| 375-396         | LE | gttgagattgttcacgtaggccTTTTTtaggcataggaccctgtct     |
| 397-416         | LE | tggtactctcctcgggtggTTTTTtaggcataggaccctgtct        |
| 435-458         | LE | agagcgacctgagttgtaacatctTTTTTtaggcataggaccctgtct   |
| 216-229         | BL | tgcacgcccggcga                                     |
| 247-262         | BL | caccggccacagggcc                                   |
| 263-276         | BL | ccgggagcccggcgg                                    |
| Cat: NM_009804  |    |                                                    |
| 1137-1153       | CE | aaaggcggccctgaagcTTTTTctcttgaaagaaagt              |

|           |    |                                                  |
|-----------|----|--------------------------------------------------|
| 1290-1310 | CE | ctgttggggtaatagttggggTTTTTctcttgaaagaaagt        |
| 1330-1346 | CE | tccagggctgagcgtgTTTTTctcttgaaagaaagt             |
| 1118-1136 | LE | ttttgtcagggctgggctTTTTTtaggcataggaccgtgtct       |
| 1189-1212 | LE | cacaggtatctgcagatagttgggTTTTTtaggcataggaccgtgtct |
| 1213-1231 | LE | gagcgcggtagggacagttTTTTTtaggcataggaccgtgtct      |
| 1232-1251 | LE | acgtggtagttggcactcTTTTTtaggcataggaccgtgtct       |
| 1252-1269 | LE | catgcacatggggccatcTTTTTtaggcataggaccgtgtct       |
| 1270-1289 | LE | gcaccacctggtgtcatgTTTTTtaggcataggaccgtgtct       |
| 1347-1364 | LE | gcgcactggacgctgtgcTTTTTtaggcataggaccgtgtct       |
| 1154-1173 | BL | gtgagtgccgggtaggcaa                              |
| 1174-1188 | BL | tcccaggcggtagg                                   |
| 1311-1329 | BL | ctgctcgtgtgcgtgaag                               |

TrxR1: NM\_001042523

|           |    |                                                |
|-----------|----|------------------------------------------------|
| 770-791   | CE | ggtgttctgcttcgatctgttTTTTTctcttgaaagaaagt      |
| 833-855   | CE | gttaaattcgccctctatggctTTTTTctcttgaaagaaagt     |
| 923-945   | CE | ctttccggtttttcgtttatctTTTTTctcttgaaagaaagt     |
| 1051-1071 | CE | cagcctctgagccagcaatctTTTTTctcttgaaagaaagt      |
| 749-769   | LE | caatthctgtgggacgaactTTTTTtaggcataggaccgtgtct   |
| 792-811   | LE | cagtcaccctgagtcggcctTTTTTtaggcataggaccgtgtct   |
| 812-832   | LE | cctcgcgttttggattgagTTTTTtaggcataggaccgtgtct    |
| 856-875   | LE | cctaccgccagcaacactgtTTTTTtaggcataggaccgtgtct   |
| 903-922   | LE | tcacgccacggctcttaagTTTTTtaggcataggaccgtgtct    |
| 968-991   | LE | cgtagatgaaggcacattggctTTTTTtaggcataggaccgtgtct |
| 992-1011  | LE | ctccaggatgtcaccgatggTTTTTtaggcataggaccgtgtct   |
| 1012-1032 | LE | gggagtcagctctagcttcccTTTTTtaggcataggaccgtgtct  |
| 1033-1050 | LE | ccccgcctggatggctacTTTTTtaggcataggaccgtgtct     |
| 876-902   | BL | ccaatagttctcgtacaagaatctctt                    |
| 946-967   | BL | gctcttcacggtgacgggtat                          |

c-Jun: NM\_010591

|         |    |                                         |
|---------|----|-----------------------------------------|
| 146-162 | CE | gcgagggtgctgcttcaTTTTTctcttgaaagaaagt   |
| 677-696 | CE | cggctcttcctcagggcttTTTTTctcttgaaagaaagt |
| 773-792 | CE | cctcatgcgcttctctctgTTTTTctcttgaaagaaagt |
| 828-845 | CE | cgagcgatccgctccagcTTTTTctcttgaaagaaagt  |
| 870-889 | CE | gctcggagtttgcgcttctTTTTTctcttgaaagaaagt |

|                    |    |                                                |
|--------------------|----|------------------------------------------------|
| 927-951            | CE | gttcatgactttctgcttaagctgtTTTTTctcttgaaagaaagt  |
| 661-676            | LE | gcagccgcgggtgctgTTTTTaggcataggaccggtct         |
| 697-714            | LE | catctccggcacggctgTTTTTaggcataggaccggtct        |
| 715-730            | LE | gcggcgtctctcccgTTTTTaggcataggaccggtct          |
| 751-772            | LE | cctgatccgctctgagactcTTTTTaggcataggaccggtct     |
| 846-869            | LE | aaggtttcacttttctctagcTTTTTaggcataggaccggtct    |
| 907-926            | LE | gccacctgttcctgagcatTTTTTaggcataggaccggtct      |
| 952-971            | LE | tggcaccactgttaacgtgTTTTTaggcataggaccggtct      |
| 972-993            | LE | caactgctgcgttagcatgagtTTTTTaggcataggaccggtct   |
| 731-750            | BL | catgtcgataggggacaggg                           |
| 793-808            | BL | aggcggcaatgcggtt                               |
| 809-827            | BL | ttcctttccggcacttg                              |
| 890-906            | BL | gttgccgtggatcca                                |
| c-Myc: NM_010849   |    |                                                |
| 1715-1735          | CE | agctcgttctctctgacgtTTTTTctcttgaaagaaagt        |
| 1858-1880          | CE | gtcctttcagaggtagctgtTTTTTctcttgaaagaaagt       |
| 1950-1971          | CE | cagctcctctcgagtaggtcTTTTTctcttgaaagaaagt       |
| 1695-1714          | LE | tccaagacgtgtgtgccgTTTTTaggcataggaccggtct       |
| 1755-1774          | LE | tcagggatctggtcacgcagTTTTTaggcataggaccggtct     |
| 1775-1795          | LE | gcctttcgtgtttccaatTTTTTaggcataggaccggtct       |
| 1818-1836          | LE | ggatgtaggcgtggcttTTTTTaggcataggaccggtct        |
| 1881-1903          | LE | tgttctcgtcgttctcaataaTTTTTaggcataggaccggtct    |
| 1904-1926          | LE | gctgttcgagttgtgttcaacTTTTTaggcataggaccggtct    |
| 1927-1949          | LE | agttatgcaccagagttcgaaTTTTTaggcataggaccggtct    |
| 1972-1996          | LE | ttctcctactctcacgagagattcTTTTTaggcataggaccggtct |
| 1736-1754          | BL | ggcaaaaagctgcgcttc                             |
| 1796-1817          | BL | ttgaggatcactacctgggg                           |
| 1837-1857          | BL | gctcgtctgcttgaatggaca                          |
| Gadd45b: NM_008655 |    |                                                |
| 683-707            | CE | cagcgttctctagagagatataggTTTTTctcttgaaagaaagt   |
| 800-821            | CE | ggtagccttgagggtgttcTTTTTctcttgaaagaaagt        |
| 952-970            | CE | ctcttcctgaggtgccctTTTTTctcttgaaagaaagt         |
| 1013-1030          | CE | cggctcgcgagcagaggctTTTTTctcttgaaagaaagt        |
| 732-752            | LE | ggggacagcaactcgacagttTTTTTaggcataggaccggtct    |

|                  |    |                                                     |
|------------------|----|-----------------------------------------------------|
| 753-783          | LE | tgcaaatatgtattttattfacttttttaTTTTTaggcataggaccggtct |
| 897-914          | LE | ggctccacagcccagaggTTTTTaggcataggaccggtct            |
| 915-934          | LE | ccacctgtggtgctgctcctTTTTTaggcataggaccggtct          |
| 935-951          | LE | ccttccgacctcggcgaTTTTTaggcataggaccggtct             |
| 995-1012         | LE | ggctgcaggactgccaggTTTTTaggcataggaccggtct            |
| 1031-1049        | LE | gcggtgtccagaccgctgTTTTTaggcataggaccggtct            |
| 708-731          | BL | gcttagatgttggagtgggtct                              |
| 784-799          | BL | tgggggatgagggggc                                    |
| 971-994          | BL | cctggctctaaagtctcagtctc                             |
| Pgc1a: NM_008904 |    |                                                     |
| 485-506          | CE | gctgcatggttctgagtgctaaTTTTTctctggaaagaaagt          |
| 550-571          | CE | tattgctccatgaattctcggTTTTTctctggaaagaaagt           |
| 615-639          | CE | cagatactgagaagctctgagcagTTTTTctctggaaagaaagt        |
| 683-704          | CE | cattgtctctgctgctgttccTTTTTctctggaaagaaagt           |
| 705-725          | CE | tgggactcttttggagcaTTTTTctctggaaagaaagt              |
| 464-484          | LE | gaccgtgcattcatttagcTTTTTaggcataggaccggtct           |
| 507-527          | LE | ctgatcctgtgggtgtggttTTTTTaggcataggaccggtct          |
| 528-549          | LE | cttaacaatggcagggttgtTTTTTaggcataggaccggtct          |
| 594-614          | LE | ggacgtctttgtggctttgcTTTTTaggcataggaccggtct          |
| 640-660          | LE | aggagggtcatcgtttgtgtTTTTTaggcataggaccggtct          |
| 661-682          | LE | tgtttctgtgggttgggtgTTTTTaggcataggaccggtct           |
| 726-745          | LE | gttgcgactcgggtgtgtaTTTTTaggcataggaccggtct           |
| 572-593          | BL | gttgacaaatgctctcgtct                                |
| Chop: NM_007837  |    |                                                     |
| 231-250          | CE | aatctggagagcgagggctTTTTTctctggaaagaaagt             |
| 251-272          | CE | tgggccatagaactctgactggTTTTTctctggaaagaaagt          |
| 273-293          | CE | tgctctcctcctcctccTTTTTctctggaaagaaagt               |
| 394-415          | CE | gctcgttctctcagctagctgTTTTTctctggaaagaaagt           |
| 416-435          | CE | ctcgattcctgcttgagccTTTTTctctggaaagaaagt             |
| 211-230          | LE | tgggatgtgcgtgtgacctTTTTTaggcataggaccggtct           |
| 294-316          | LE | gttccgttcttagttcttctTTTTTaggcataggaccggtct          |
| 317-336          | LE | ggctgggactgaccactctTTTTTaggcataggaccggtct           |
| 354-374          | LE | tcctgctccttctcctcatgTTTTTaggcataggaccggtct          |
| 375-393          | LE | tgccacttccgctcgttTTTTTaggcataggaccggtct             |

|                  |    |                                                  |
|------------------|----|--------------------------------------------------|
| 436-453          | LE | cacctccctggtcaggcgTTTTTaggcataggaccctgtct        |
| 454-470          | LE | gcccgcctgtggctctTTTTTaggcataggaccctgtct          |
| 471-490          | LE | tgaccatgCGgtcgatcagaTTTTTaggcataggaccctgtct      |
| 337-353          | BL | cgttgcttccaggccg                                 |
| Cpt1a: NM_013495 |    |                                                  |
| 372-391          | CE | agagcagcacctcagcgagTTTTTctcttgaaagaaagt          |
| 413-432          | CE | gctcatttgccgtgctctgTTTTTctcttgaaagaaagt          |
| 433-451          | CE | tccagattctggctgctcgTTTTTctcttgaaagaaagt          |
| 496-516          | CE | cggcagagacgtctggaagctTTTTTctcttgaaagaaagt        |
| 350-371          | LE | tagcgcatagtcgatgatcgTTTTTaggcataggaccctgtct      |
| 392-412          | LE | caaacatccagccatggtaggTTTTTaggcataggaccctgtct     |
| 475-495          | LE | gtacaacatgggcttgcaccTTTTTaggcataggaccctgtct      |
| 534-555          | LE | cctgctcacggtatcttgacaTTTTTaggcataggaccctgtct     |
| 556-576          | LE | tggcctcacagactccaggtaTTTTTaggcataggaccctgtct     |
| 619-640          | LE | caaggtgacagcaaaatcctgTTTTTaggcataggaccctgtct     |
| 452-474          | BL | cgagaagacctgaccatagcca                           |
| 517-533          | BL | gctgggacaggcaggcg                                |
| 577-598          | BL | ggaagtctccctcctcatcag                            |
| 599-617          | BL | gccagtgtgtcatgcgtt                               |
| Aox1: NM_015729  |    |                                                  |
| 927-949          | CE | gctcgcttctcttgattcagacTTTTTctcttgaaagaaagt       |
| 971-994          | CE | agagttatactgctgctgctgaaTTTTTctcttgaaagaaagt      |
| 1061-1081        | CE | ggcaatgctctattaatccTTTTTctcttgaaagaaagt          |
| 1141-1162        | CE | cagcattggctgtccaggtagtTTTTTctcttgaaagaaagt       |
| 889-907          | LE | atcgaatggcaatggtgcaTTTTTaggcataggaccctgtct       |
| 908-926          | LE | tggcgctcacagcactgtTTTTTaggcataggaccctgtct        |
| 950-970          | LE | aatccaaaatctggggctctgTTTTTaggcataggaccctgtct     |
| 1034-1060        | LE | gcatgtaggtctccttatgtatctcTTTTTaggcataggaccctgtct |
| 1082-1101        | LE | cagctcactcaggctgccttTTTTTaggcataggaccctgtct      |
| 1122-1140        | LE | aaaagcctcagcccagctTTTTTaggcataggaccctgtct        |
| 1163-1184        | LE | gccatccgacattctcgatacTTTTTaggcataggaccctgtct     |
| 995-1011         | BL | ggtggccaggagcggga                                |
| 1012-1033        | BL | cgagaaagtgaaggcataggc                            |
| 1102-1121        | BL | gtgaggcatgaagctcagg                              |

Ucp2: NM\_011671

|         |    |                                              |
|---------|----|----------------------------------------------|
| 285-305 | CE | acagaggaactctgccggagtTTTTTctcttgaaagaaagt    |
| 326-346 | CE | gagaaattggagaaacggggaTTTTTctcttgaaagaaagt    |
| 347-367 | CE | tgctacctccagaagatggaTTTTTctcttgaaagaaagt     |
| 511-531 | CE | ctagcccttgactctcccctTTTTTctcttgaaagaaagt     |
| 246-264 | LE | ctcaggctgaggcctcaaTTTTTaggcataggaccctgtct    |
| 306-325 | LE | cctcaatcggcaagacgagTTTTTaggcataggaccctgtct   |
| 368-390 | LE | aaccaacctgattctgattccTTTTTaggcataggaccctgtct |
| 391-410 | LE | gggcacatctgtggcctgaTTTTTaggcataggaccctgtct   |
| 450-470 | LE | gatgagatctgcaatgcaggcTTTTTaggcataggaccctgtct |
| 492-510 | LE | ggatctgcagccggacctTTTTTaggcataggaccctgtct    |
| 265-284 | BL | tctggaggctgcttgaggt                          |
| 411-432 | BL | ggaactcacagtggctgttg                         |
| 433-449 | BL | agctgtcccagcccca                             |
| 471-491 | BL | ggcggtatccagagggaaagt                        |

Dgat2: NM\_026384

|           |    |                                                |
|-----------|----|------------------------------------------------|
| 1663-1680 | CE | ccctgcccagctagccaTTTTTctcttgaaagaaagt          |
| 1761-1777 | CE | tgccctcagcctcccctTTTTTctcttgaaagaaagt          |
| 1858-1877 | CE | ccagggtaggctcagattggTTTTTctcttgaaagaaagt       |
| 1998-2016 | CE | ggctcaggaggatatgcgTTTTTctcttgaaagaaagt         |
| 1681-1703 | LE | atccctggagtactaaggactgTTTTTaggcataggaccctgtct  |
| 1724-1740 | LE | gcagccacgggtgggacTTTTTaggcataggaccctgtct       |
| 1741-1760 | LE | tggtacgaggaaccgacctTTTTTaggcataggaccctgtct     |
| 1795-1818 | LE | cagtccagatgttatctaccctcTTTTTaggcataggaccctgtct |
| 1819-1836 | LE | gcagagaccaagccgggTTTTTaggcataggaccctgtct       |
| 1878-1898 | LE | ccctagccaggagacaggaggTTTTTaggcataggaccctgtct   |
| 1899-1917 | LE | acctgtgggacagccgtgtTTTTTaggcataggaccctgtct     |
| 1918-1937 | LE | gcgagataaccaagacggcTTTTTaggcataggaccctgtct     |
| 1959-1976 | LE | ccatggtgccaacctccaTTTTTaggcataggaccctgtct      |
| 1977-1997 | LE | cagagcaacgctgagctgtgtTTTTTaggcataggaccctgtct   |
| 1704-1723 | BL | atggcctctgcctctcaaga                           |
| 1778-1794 | BL | ccaagtggggccagctg                              |
| 1837-1857 | BL | agaagagggctagggtgagga                          |
| 1938-1958 | BL | gagtgaaccagccaacagca                           |



p21: NM\_0076694

|         |    |                                             |
|---------|----|---------------------------------------------|
| 42-60   | CE | gcgctgactccaattcccTTTTTctcttgaaagaaagt      |
| 124-143 | CE | gctcctgtgcggaacaggctTTTTTctcttgaaagaaagt    |
| 259-275 | CE | cagcggcgtctccgtgaTTTTTctcttgaaagaaagt       |
| 312-330 | CE | ggtagacctgggcagcccTTTTTctcttgaaagaaagt      |
| 2-21    | LE | gctcacacctctcggctgcTTTTTtagcataggaccctgtct  |
| 22-41   | LE | ctagactctgacaccggcTTTTTtagcataggaccctgtct   |
| 166-185 | LE | ctgctcactgtccacgggacTTTTTtagcataggaccctgtct |
| 218-235 | LE | cgggcctcctggagacagTTTTTtagcataggaccctgtct   |
| 295-311 | LE | taggctccgaacgcgctTTTTTtagcataggaccctgtct    |
| 331-347 | LE | gcgggaccagggtcaTTTTTtagcataggaccctgtct      |
| 348-365 | LE | tcccaggctgcacggctTTTTTtagcataggaccctgtct    |
| 61-83   | BL | tgtctggatatcgtgtggatct                      |
| 84-102  | BL | tggtgcctgtggctctgaa                         |
| 103-123 | BL | ggacatcaccaggattggaca                       |
| 144-165 | BL | cgaagagacaacggcacacttt                      |
| 186-201 | BL | cgcaatcacggcgcaa                            |
| 202-217 | BL | cccgccatgagcgc                              |
| 236-258 | BL | cgaagtcaaagttccaccgttct                     |
| 276-294 | BL | cccagacgaagttgccctc                         |

Prdx: NM\_0110343

|         |    |                                                   |
|---------|----|---------------------------------------------------|
| 412-435 | CE | gccttaagactccataatcctgaTTTTTctcttgaaagaaagt       |
| 643-668 | CE | tctgcttagagaaatactcttgctcTTTTTctcttgaaagaaagt     |
| 848-873 | CE | gtttctgtgactgatagaagattggTTTTTctcttgaaagaaagt     |
| 369-393 | LE | tctgatattaagggatgttcatggTTTTTtagcataggaccctgtct   |
| 488-513 | LE | agatcgtttattgtatctgtcgaagTTTTTtagcataggaccctgtct  |
| 530-555 | LE | tggactagtcgtataatctcatccacTTTTTtagcataggaccctgtct |
| 577-599 | LE | cagctggacacacttcacatgtTTTTTtagcataggaccctgtct     |
| 600-619 | LE | atcactgccagggttcagcTTTTTtagcataggaccctgtct        |
| 620-642 | LE | ttattgacatcaggcttgatggTTTTTtagcataggaccctgtct     |
| 692-709 | LE | tgctcaatgctgcctggcTTTTTtagcataggaccctgtct         |
| 737-760 | LE | acaccacatcatgtgttaagcacTTTTTtagcataggaccctgtct    |
| 785-802 | LE | gctatccatcccagcccTTTTTtagcataggaccctgtct          |
| 901-929 | LE | tcagaattcacgtttaagatacttaaTTTTTtagcataggaccctgtct |

|         |    |                              |
|---------|----|------------------------------|
| 394-411 | BL | gcaatggtgcgcttgga            |
| 436-459 | BL | cccctgaaagagataccttcatca     |
| 460-487 | BL | gatacccttatcatcaataataaaaagg |
| 514-529 | BL | agagcggccaacggga             |
| 556-576 | BL | ttgtcagtgaactggaaggcc        |
| 669-691 | BL | agaaaaatggtccagtgtcact       |
| 710-736 | BL | gagtagagtacaagagtttcttctggc  |
| 761-784 | BL | tgtaggaaaggcttatctggaatc     |
| 803-827 | BL | gaccattaccaatagtgaagaaag     |
| 828-847 | BL | tctgccccaaaacacagctca        |
| 874-900 | BL | aaaagaagaaaaagaattaacaggtt   |

$\alpha$ -Sma: NM\_0073922

|         |    |                                                 |
|---------|----|-------------------------------------------------|
| 122-140 | CE | cgaagccggccttacagagTTTTTctcttgaaagaaagt         |
| 244-264 | CE | cctctctgtctctgggcttcaTTTTTctcttgaaagaaagt       |
| 413-430 | CE | tttctcccggttggccttTTTTTctcttgaaagaaagt          |
| 83-102  | LE | accagggtgtgtgtcttcTTTTTtaggcataggaccctgtct      |
| 141-160 | LE | cctgggagcatcatcaccagTTTTTtaggcataggaccctgtct    |
| 181-200 | LE | cctgatgtctgggagctcccTTTTTtaggcataggaccctgtct    |
| 201-221 | LE | ggccattccaaccattactcTTTTTtaggcataggaccctgtct    |
| 222-243 | LE | tccccacatagctgtcttttTTTTTtaggcataggaccctgtct    |
| 265-286 | LE | cggatacttcagcgtcaggatcTTTTTtaggcataggaccctgtct  |
| 287-308 | LE | tggatgatgccgtgtctatTTTTTtaggcataggaccctgtct     |
| 431-454 | LE | ggtctcaacataatctgggtcatTTTTTtaggcataggaccctgtct |
| 103-121 | BL | cccagagccattgtcgac                              |
| 161-180 | BL | acgatggatgggaaaacagc                            |
| 309-329 | BL | tcttttccatgtctcccagt                            |
| 330-353 | BL | cgttatagaaagagtggtgccaga                        |
| 354-371 | BL | caggggccacacgaagct                              |
| 372-392 | BL | tcagcagtgctggatgtctt                            |
| 393-412 | BL | agggttcagtggtgcctctg                            |

Col1a1: NM\_0077423

|           |    |                                           |
|-----------|----|-------------------------------------------|
| 4213-4232 | CE | agcagggccttcttgaggtTTTTTctcttgaaagaaagt   |
| 4233-4251 | CE | ctcgttgatccctggaggTTTTTctcttgaaagaaagt    |
| 4414-4434 | CE | tagtccgaattcctggtctggTTTTTctcttgaaagaaagt |

|           |    |                                              |
|-----------|----|----------------------------------------------|
| 4130-4147 | LE | cggaggacattaggcgcaTTTTTaggcataggaccgtgtct    |
| 4148-4167 | LE | ggtgatgttctgggaggcctTTTTTaggcataggaccgtgtct  |
| 4191-4212 | LE | gccagtctgctggccatgtagTTTTTaggcataggaccgtgtct |
| 4252-4271 | LE | ccttcgcctctgagctcgatTTTTTaggcataggaccgtgtct  |
| 4294-4311 | LE | gcagccgtccacaagggtTTTTTaggcataggaccgtgtct    |
| 4375-4393 | LE | ccacatcgatgatgggcagTTTTTaggcataggaccgtgtct   |
| 4394-4413 | LE | ggcaccaatgtccaaggagTTTTTaggcataggaccgtgtct   |
| 4435-4452 | LE | gcaggcagggccaatgtcTTTTTaggcataggaccgtgtct    |
| 4168-4190 | BL | gctacgctgttcttcagtgata                       |
| 4272-4293 | BL | gctgtaggatgaagcgactgttg                      |
| 4312-4332 | BL | ccaagttccggtgtgactcgt                        |
| 4333-4355 | BL | ttgtattcgatgactgtcttgcc                      |
| 4356-4374 | BL | gcgggaggcttgggtggt                           |

---

Supplemental Table 2. Real-time PCR primers.

| Name           | Accession No. | Forward primer           | Reverse primer          |
|----------------|---------------|--------------------------|-------------------------|
| Cyp7a1         | NM_007824     | ATCCTGGCAAACAGAAATCG     | GGCCAAGTCTGGTTTCTCTG    |
| Cyp8b1         | NM_010012     | AGTTGCAGCGTCTCTTCCAT     | CCTTGCTCCCTCAGAACTG     |
| Cyp27a1        | NM_024264     | GAGAGTGAATCAGGGGACCA     | TCAGGAATGGAGGGTTTCAG    |
| Cyp7b1         | NM_007825     | GCCTTTTGGACTCGGAACAAG    | AATCGGGGTGCTGAATACCTAA  |
| Abcg5          | NM_031844     | AATTTTGGGGGAATTTCCAG     | GTCCTGTGGTTGGCTCATCT    |
| Abcg8          | NM_026180     | CCTCCGATTGCTTCTTTCAG     | CTGAGAAATGCCCCAGATA     |
| Hnf4a1         | NM_008261     | GAAAATGTGCAGGTGTTGACCA   | TGTGGTTCTTCTCACGCTC     |
| Lrh-1          | NM_030676     | AACGCAGAGAAAACGATGTCC    | CATTGCTTGGATCACCTGAGA   |
| Cyp1a1         | NM_001136059  | TTTGGTTTGGGCAAGCGAAAG    | TGAAGATGCTGAGGACCAGAA   |
| Nrf2           | NM_010902     | GATAGTGCCCCTGGAAGTGT     | TCGTGTGAGATGAGCCTCTAA   |
| Nqo1           | NM_008706     | TATCCTTCCGAGTCATCTCTAGCA | TCTGCAGCTTCCAGCTTCTTG   |
| C/EBP $\beta$  | NM_009883     | GTAATCACCTTAAAGATGTTCTTG | CTTTAATGCTCGAAACGGAAAAG |
| C/EBP $\alpha$ | NM_007678     | AAGAACAGCAACGAGTACCG     | GTGTCCAGTTCACGGCTCA     |
| PPAR $\gamma$  | NM_011146     | CCCAATGGTTGCTGATTACAAA   | GAGGGAGTTAGAAGGTTCTTC   |
| PGC-1 $\alpha$ | NM_008904     | ATCACGTTCAAGGTCACCCTA    | CAAAGCGGTCTCTCAATTCTG   |
| Srebp-1c       | NM_011480     | TAGGTCACCGTTTCTTTGTGG    | ATCCAAGGGCATCTGAGAACT   |
| Adipsin        | NM_013459     | GAACCGGACAACCTGCAATCT    | CACGTAACCACACCTTCGACT   |
| Adiponectin    | NM_009605     | CTCTTAATCCTGCCAGTCAT     | TAGGACCAAGAAGACCTGCAT   |
| Acly           | NM_134037     | CCCAGTGAACAACAGACCTAT    | ACAAAGATGGTGACCTCATGC   |
| FasN           | NM_007988     | GACCTTCATGGACACAATGCT    | ATACCACCAGAGACCGTTATG   |
| SCD1           | NM_009127     | TAGCTTTGGGTGCCTTATCTC    | ACGAGGACGACAATACAATCG   |
